# Supplementary material for: A high-entropy FeCoMnCuNi diselenide self-standing electrode with outstanding water-electrolysis performance in alkaline medium
Source: Royal Society of Chemistry journal article supplement (doi:10.1039/d4qi01835d), 2024-01-01
Supplement: d4qi01835d1.pdf [file d4qi01835d1.pdf]

## Supporting Information

### High-Entropy FeCoMnCuNi diselenide Self-Standing Electrode with Outstanding Water-Electrolysis Performance in Alkaline Medium

Xinxin Guo <sup>a, †</sup>, Mengmeng Zhou <sup>a, †</sup>, Ziwu Liu <sup>a, \*</sup>, Shiheng Mu <sup>a</sup>, Kaijia Wang <sup>a</sup>, Huanqiang Shi <sup>a</sup>, Fang Wang <sup>a, b, \*\*</sup>, Zhonghai Ni <sup>a</sup> and Guiqing Liu <sup>b, \*\*\*</sup>

<sup>a</sup> Jiangsu Key Laboratory of Coal-based Greenhouse Gas Control and Utilization, School of Chemical Engineering and Jiangsu Province Engineering Laboratory of High Efficient Energy Storage Technology and Equipments, China University of Mining & Technology, Xuzhou 221008, Jiangsu, China

<sup>b</sup> Jiangsu BGRIMM Metal Recycling Science & Technology Co., Ltd, Xuzhou 221008, Jiangsu, China

† These authors contributed equally to this work.

\*Corresponding author, Email address: lzwmsy@cumt.edu.cn, Fax: 86-516-83883501.

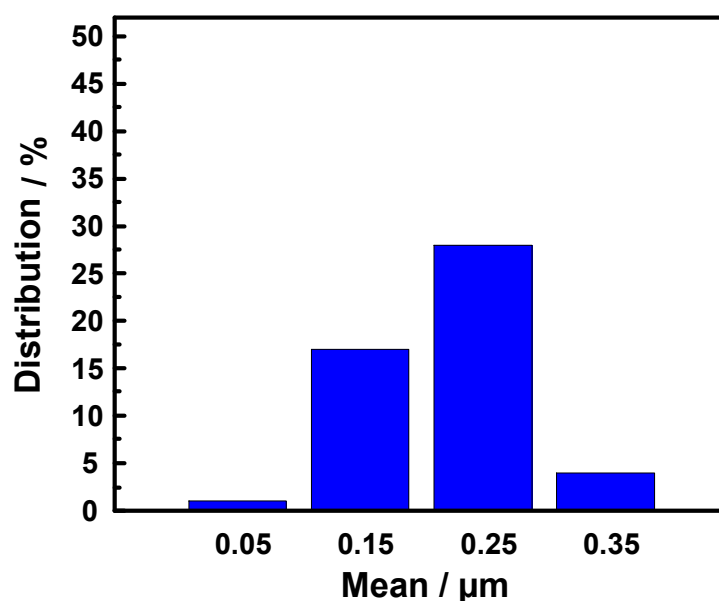

Fig. S1 The thickness-distribution histograms of petunia leaves on the surface of

FeCoMnCuNiSe<sub>2</sub>.

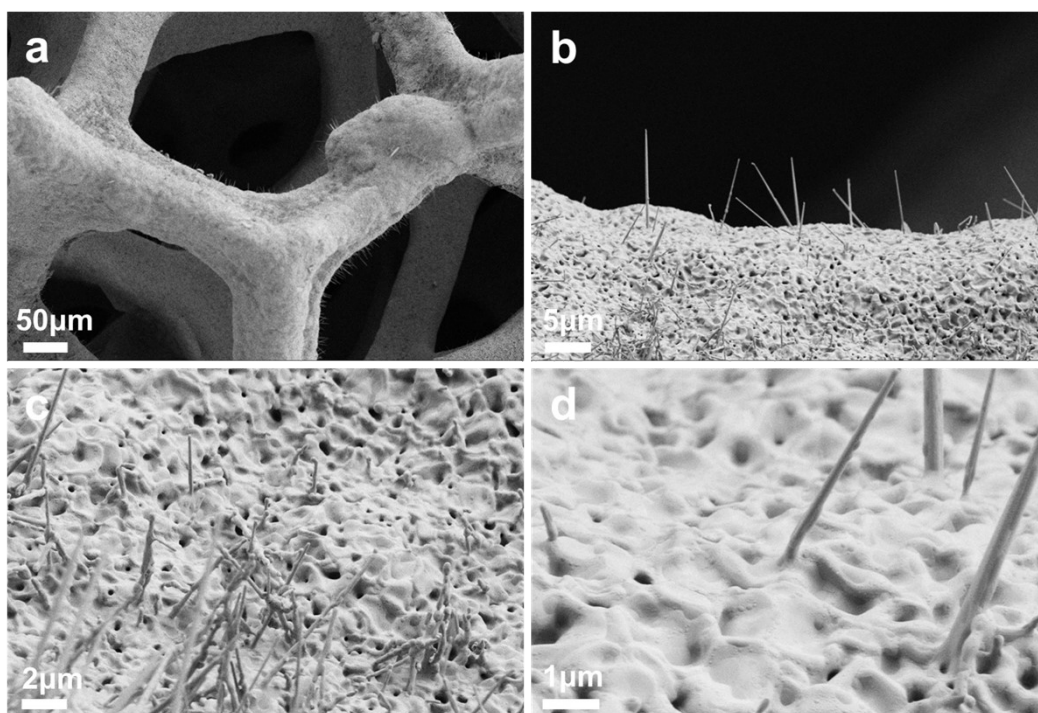

**Fig. S2** The SEM images of selenized bare NF (a-d).

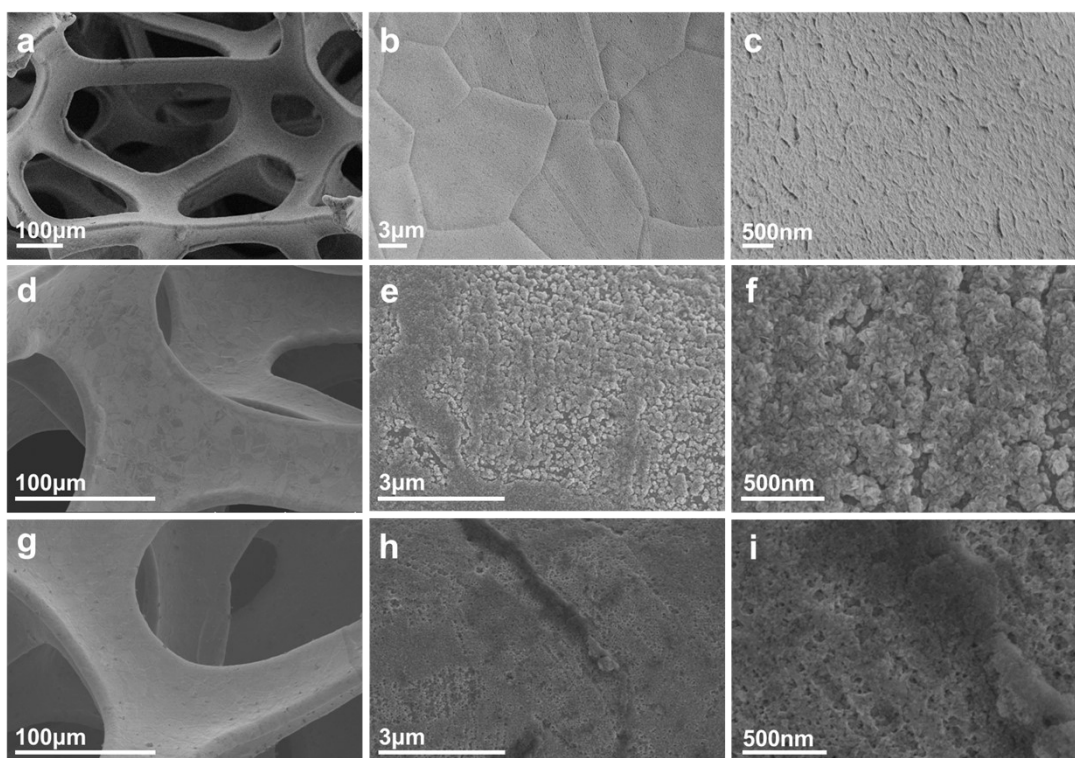

**Fig. S3** The SEM images of bare NF (a, b, c), bare NF heated at 450 °C for 3 h with argon protection (d, e, f) and FeCoMnCuOOH before selenization (g, h, i).

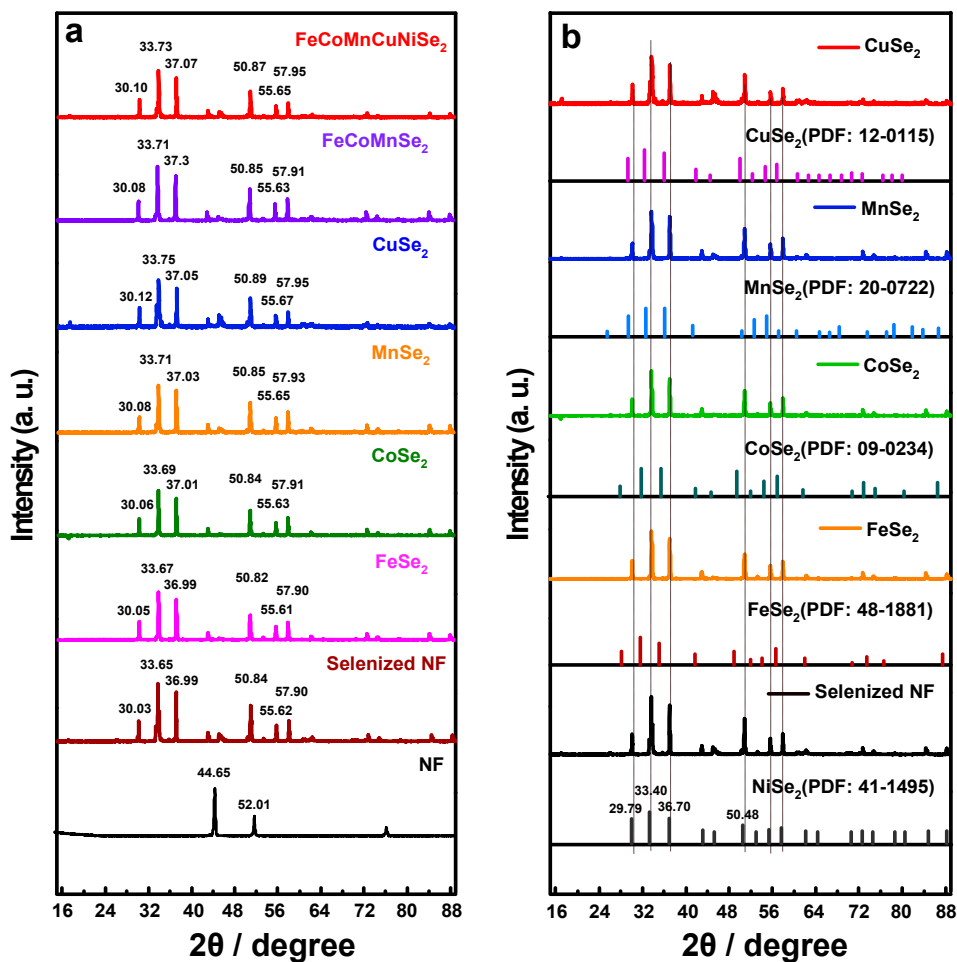

**Fig. S4** XRD patterns of FeCoMnCuNiSe<sub>2</sub>, FeCoMnSe<sub>2</sub>, CuNiSe<sub>2</sub>, FeSe<sub>2</sub>, CoSe<sub>2</sub>, MnSe<sub>2</sub>, CuSe<sub>2</sub>, NFSe<sub>2</sub> and NF (a); XRD patterns of FeSe<sub>2</sub>, CoSe<sub>2</sub>, MnSe<sub>2</sub>, CuSe<sub>2</sub>, selenized NF and JCPDS cards of CoSe<sub>2</sub>, FeSe<sub>2</sub>, CuSe<sub>2</sub>, MnSe<sub>2</sub> and NiSe<sub>2</sub> (b).

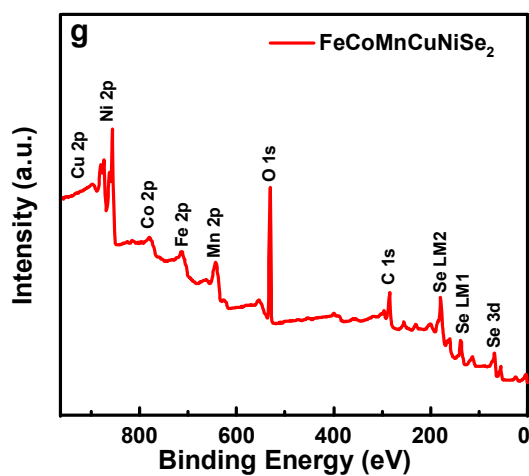

**Fig. S5** XPS survey of the FeCoMnCuNiSe<sub>2</sub>.

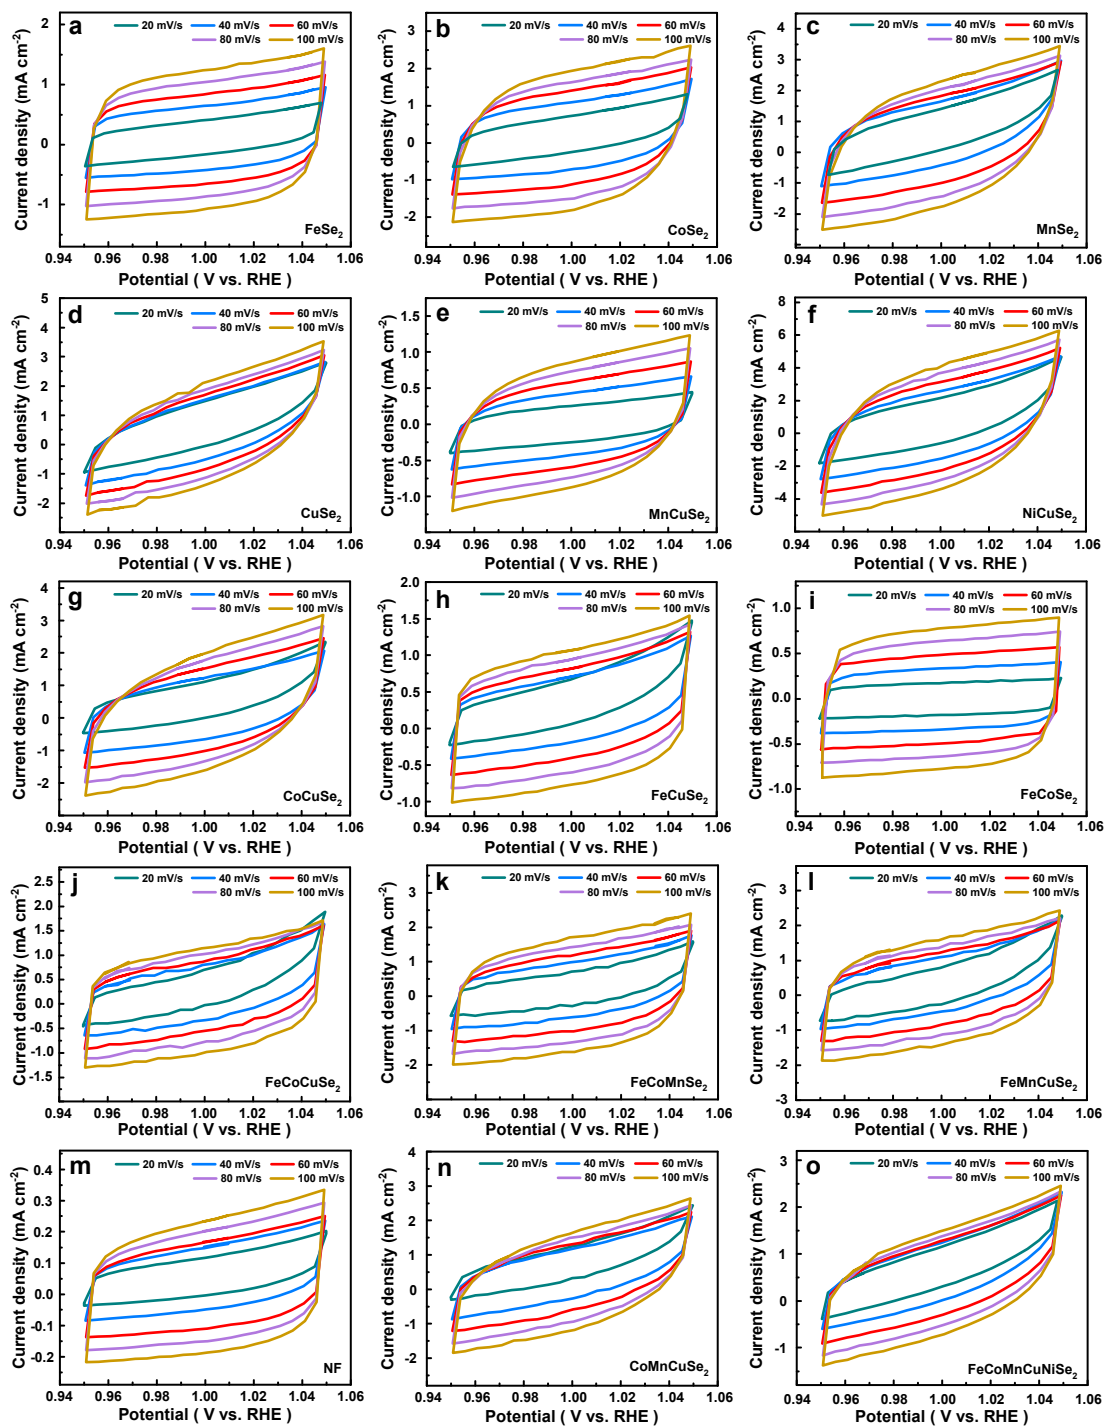

**Fig. S6** Cyclic voltammograms for FeSe<sub>2</sub> (a), CoSe<sub>2</sub> (b), MnSe<sub>2</sub> (c), CuSe<sub>2</sub> (d), MnCuSe<sub>2</sub> (e), NiCuSe<sub>2</sub> (f), CoCuSe<sub>2</sub> (g), FeCuSe<sub>2</sub> (h), FeCoSe<sub>2</sub> (i), FeCoCuSe<sub>2</sub> (j), FeCoMnSe<sub>2</sub> (k), FeMnCuSe<sub>2</sub> (l), NF (m), CoMnCuSe<sub>2</sub> (n), and FeCoMnCuNiSe<sub>2</sub> (o) at the scan rate of 20, 40, 60, 80 and 100 mV s<sup>-1</sup> in 1.0 M KOH.

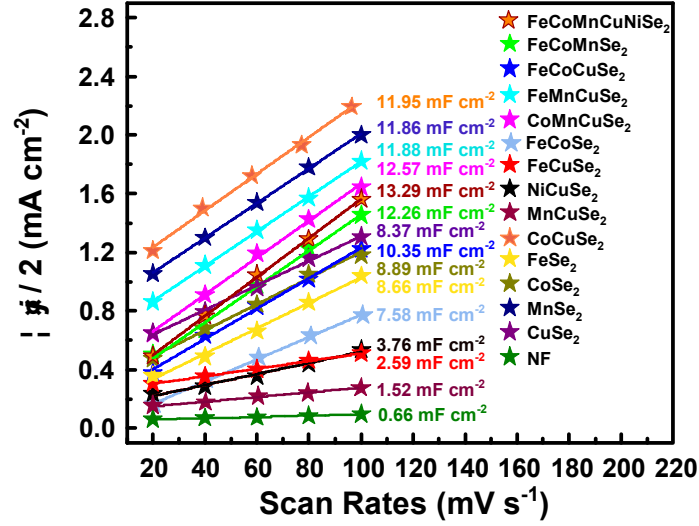

**Fig. S7**  $C_{dl}$  values of FeSe<sub>2</sub>, CoSe<sub>2</sub>, MnSe<sub>2</sub>, CuSe<sub>2</sub>, MnCuSe<sub>2</sub>, NiCuSe<sub>2</sub>, CoCuSe<sub>2</sub>, FeCoCuSe<sub>2</sub>, FeCuSe<sub>2</sub>, FeCoSe<sub>2</sub>, FeCoMnSe<sub>2</sub>, FeMnCuSe<sub>2</sub>, NF, CoMnCuSe<sub>2</sub> and FeCoMnCuNiSe<sub>2</sub> at -0.20 V.

In the process of linear scanning, the current displayed by the instrument consists of two parts:

$$i = i_f + i_c \quad (1-1)$$

$i_f$  is faradaic current from electrochemical reaction,  $i_c$  is charge and discharge current of the electric double layer, and:

$$i_c = \frac{dq}{dt} = \frac{d(C_{dl}\psi)}{dt} = C_{dl} \frac{d\psi}{dt} + \psi \frac{dC_{dl}}{dt} \quad (1-2)$$

When the potential window in the Faraday region is selected to be smaller, the electric double layer capacitance  $C_{dl}$  remains almost unchanged, Then (1-2) can be simplified as:

$$i_c = C_{dl} \frac{d\psi}{dt} \quad (1-3)$$

At the same time, there is a linear relationship between the electrochemical active area and the electric double layer capacitance:

$$ECSA = \frac{C_{dl}}{R} \quad (1-4)$$

where R is a constant in (1-4),  $C_{dl}$  is directly used to measure the ECSA of the catalyst.

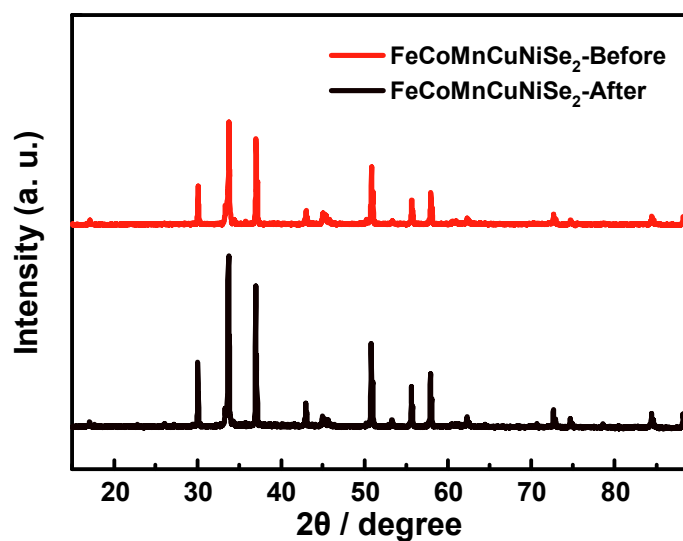

Fig. S8 The XRD spectra of FeCoMnCuNiSe<sub>2</sub> before and after 16 h stability.

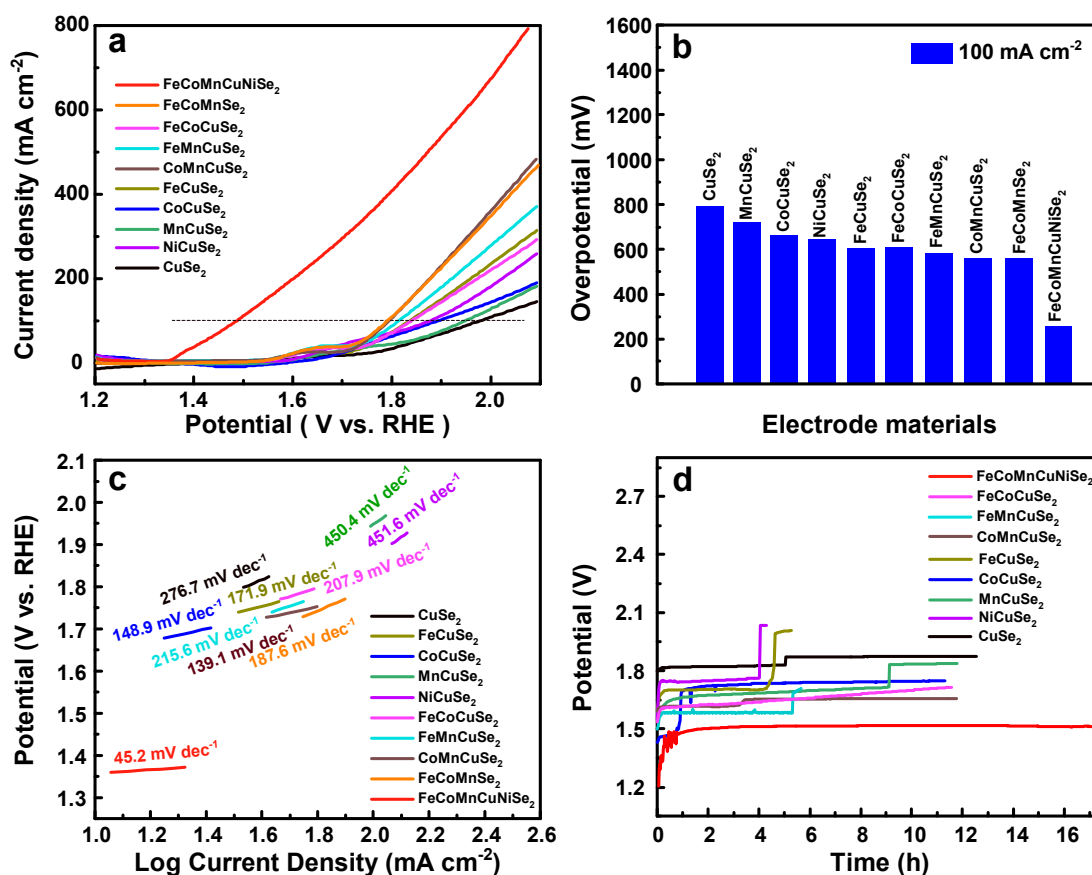

Fig. S9 The OER LSV curves (a), overpotentials at current density of 100 mA cm<sup>-2</sup> (b), Tafel plots

(c), OER durability curves (d) of, FeCoMnCuNiSe<sub>2</sub>, FeCoCuSe<sub>2</sub>, CoMnCuSe<sub>2</sub>, FeMnCuSe<sub>2</sub>,

FeCuSe<sub>2</sub>, CoCuSe<sub>2</sub>, MnCuSe<sub>2</sub>, NiCuSe<sub>2</sub> and CuSe<sub>2</sub> at 10 mA cm<sup>-2</sup>.

**Table S1** Atomic percentages of Fe, Co, Mn, Cu, Ni in the corresponding solutions of dissolved FeCoMnCuNiSe<sub>2</sub> in 6.0 M HCl for 1, 2, 4, 10 min at room temperature and in aqua regia at 170 °C for 36 h.

| Time   | Fe   | Co   | Mn   | Cu   | Ni    |
|--------|------|------|------|------|-------|
| 1 min  | 33.0 | 14.0 | 24.0 | 3.0  | 25.0  |
| 2 min  | 34.0 | 15.0 | 28.0 | 1.0  | 21.0  |
| 4 min  | 24.0 | 9.0  | 15.0 | 4.0  | 47.0  |
| 10 min | 8.0  | 5.0  | 10.0 | 1.0  | 76.0  |
| 36 h   | 0.54 | 0.38 | 0.38 | 0.34 | 98.35 |

**Table S2** The HER, OER and OWS performance comparisons of prepared FeCoMnCuNiSe<sub>2</sub> to recently reported advanced electrocatalysts.

| Catalyst                                                                             | Support   | Overpotential for HER (mV / mA cm <sup>-2</sup> ) | Overpotential for OER (mV / mA cm <sup>-2</sup> ) | Cell voltage (mA cm <sup>-2</sup> / V) | Reference        |
|--------------------------------------------------------------------------------------|-----------|---------------------------------------------------|---------------------------------------------------|----------------------------------------|------------------|
| <b>FeCoMnCuNiSe<sub>2</sub></b>                                                      | <b>NF</b> | <b>71.6/ 100</b>                                  | <b>254.8/100</b>                                  | <b>100 / 1.51</b>                      | <b>This work</b> |
| 0.2-NiSe                                                                             | NF        | 95 / 10                                           | -                                                 | 10 / 1.54                              | [1]              |
| NiSe <sub>2</sub>                                                                    | NF        | 166 / 10                                          | 235/10                                            | 10 / 1.64                              | [2]              |
| CoO/CoSe <sub>2</sub>                                                                | Ti-mesh   | 337 / 10                                          | -                                                 | 10 / 2.18                              | [3]              |
| FeSe                                                                                 | NF        | 200 / 10                                          | 190/100                                           | 50 / 1.85                              | [4]              |
| CoSe/Co <sub>9</sub> Se <sub>8</sub>                                                 | NF        | 268 / 100                                         | 280/100                                           | 10.3 / 1.8                             | [5]              |
| CuSe                                                                                 | NF        | 162 / 10                                          | 297/10                                            | 10 / 1.68                              | [6]              |
| CoNiSe <sub>2</sub>                                                                  | NF        | 146 / 100                                         | 307/100                                           | 10 / 1.59                              | [7]              |
| (Ni,Co)Se <sub>2</sub> /CoSe <sub>2</sub>                                            | NF        | 169 / 100                                         | 169/100                                           | 10 / 1.56                              | [8]              |
| (Ni,Co) <sub>0.85</sub> Se                                                           | NF        | 169 / 10                                          | 287/20                                            | 10 / 1.56                              | [9]              |
| NiSe <sub>2</sub> /Ni <sub>2</sub> Se <sub>4</sub> /NF-4                             | NF        | 145 / 10                                          | -                                                 | 10 / 1.56                              | [10]             |
| NiSe <sub>2</sub> /Ni <sub>2</sub> Se <sub>4</sub> /NF-1                             | NF        | 185 / 10                                          | 337/100                                           | 10 / 1.56                              | [10]             |
| NiSe <sub>2</sub> -NiMoO <sub>4</sub>                                                | NF        | -35.6 / -10                                       | -                                                 | 10 / 1.37                              | [11]             |
| Ni <sub>20</sub> Fe <sub>20</sub> Mo <sub>10</sub> Co <sub>35</sub> Cr <sub>15</sub> | -         | 172 / 10                                          | -                                                 | -                                      | [12]             |
| AlNiCoRuMo                                                                           | -         | -24.5 / -10                                       | 245/10                                            | -                                      | [13]             |

|                         |    |             |           |            |      |
|-------------------------|----|-------------|-----------|------------|------|
| CoFeLaNiPt              | -  | 555 / 10    | 377/10    | -          | [14] |
| NiCoFeMnCrP             | -  | 220 / 10    | 270/10    | -          | [15] |
| FeCoMnNiSe <sub>2</sub> | NF | 142.2 / 100 | 223.1/100 | 100 / 1.42 | [16] |

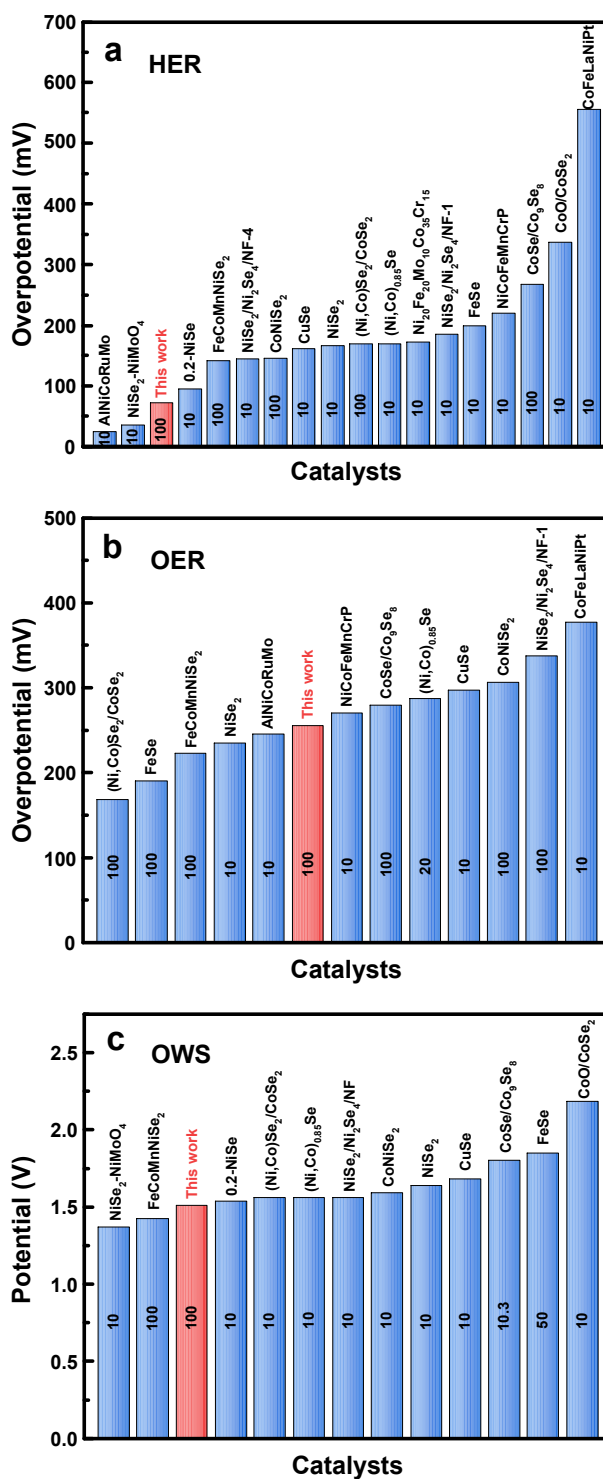

**Fig. S10** The HER, OER and OWS performance comparisons of prepared FeCoMnCuNiSe<sub>2</sub> to recently reported advanced electrocatalysts.



Video of overall water splitting based on prepared self-standing high-entropy electrode

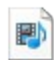

OWS Video.mp4

## References

- [1] Y. Li, Y. Zhao, F. M. Li, Z. Y. Dang and P. Q. Gao, Ultrathin NiSe nanosheets on Ni foam for efficient and durable hydrazine-assisted electrolytic hydrogen production, *ACS Appl. Mater. Interfaces*, 2021, **13**, 34457-34467.
- [2] J. Zhang, Y. Wang, C. Zhang, H. Gao, L. F. Lv, L. L. Han and Z. H. Zhang, Self-supported porous NiSe<sub>2</sub> nanowrinkles as efficient bifunctional electrocatalysts for overall water splitting, *ACS Sustain. Chem. Eng.*, 2018, **6**, 2231-2239.
- [3] K. D. Li, J. F. Zhang, R. Wu, Y. F. Yu and B. Zhang, Anchoring CoO domains on CoSe<sub>2</sub> nanobelts as bifunctional electrocatalysts for overall water splitting in neutral media, *Adv. Mater.*, 2016, **3**, 1500426.
- [4] D. Chanda, R. A. Tufa, Y. Y. Birdja, S. Basu and S. H. Liu, Hydrothermally/electrochemically decorated FeSe on Ni-foam electrode: An efficient bifunctional electrocatalysts for overall water splitting in an alkaline medium, *Int. J. Hydrog. Energy*, 2020, **45**, 27182-27192.
- [5] Y. Q. Zhao, B. Jin, Y. Zheng, H. Y. Jin, Y. Jiao and S. Z. Qiao, Charge state manipulation of cobalt selenide catalyst for overall seawater electrolysis, *Adv. Energy Mater.*, 2018, **8**, 1801926.
- [6] B. Chakraborty, R. Beltrán-Suito, V. Hlukhyy, J. Schmidt, P. W. Menezes and M. Driess,

Crystalline copper selenide as a reliable non-noble electro(pre)catalyst for overall water splitting, *ChemSusChem*, 2020, **13**, 3222-3229.

- [7] T. Chen and Y. Tan, Hierarchical CoNiSe<sub>2</sub> nano-architecture as a high-performance electro-catalyst for water splitting, *Nano Res.*, 2018, **11**, 1331-1344.
- [8] J. J. Zhu, Y. K. Lu, X. Y. Zheng, S. J. Xu, S. C. Sun, Y. Liu, D. Li and D. L. Jiang, Heterostructure arrays of (Ni,Co)Se<sub>2</sub> nanowires integrated with MOFs-derived CoSe<sub>2</sub> dodecahedra for synergistically high-efficiency and stable overall water splitting, *Appl. Surf. Sci.*, 2022, **592**, 153352.
- [9] K. M. Xiao, L. Zhou, M. F. Shao and M. Wei. Fabrication of (Ni, Co)<sub>0.85</sub>Se nanosheet arrays derived from layered double hydroxides toward largely enhanced overall water splitting, *J. Mater. Chem. A*, 2018, **6**, 7585-7591.
- [10] L. Tan, J. T. Yu J, H. Y. Wang, H. T. Gao, X. Liu, L. Wang, X. L. She and T. R. Zhan, Controllable synthesis and phase-dependent catalytic performance of dual-phase nickel selenides on Ni foam for overall water splitting, *Appl. Catal. B*, 2022, **303**, 120915.
- [11] T. Q. Yu, Q. L. Xu, J. L. Chen, G. F. Qian, X. Y. Zhou, H. F. Yang and S. B. Yin, Boosting urea-assisted water splitting by constructing sphere-flower-like NiSe<sub>2</sub>-NiMoO<sub>4</sub> heterostructure, *Chem. Eng. J.*, 2022, **449**, 137791.
- [12] G. L. Zhang, K. S. Ming, J. L. Kang, Q. Huang, Z. J. Zhang, X. R. Zheng and X. F. Bi, High entropy alloy as a highly active and stable electrocatalyst for hydrogen evolution reaction, *Electrochim. Acta*, 2018, **279**, 19-23.
- [13] Z. Y. Jin, J. Lyu, Y. L. Zhao, H. L. Li, X. Lin, G. Q. Xie, X. J. Liu, J. J. Kai and H. J. Qiu, Rugged high-entropy alloy nanowires with in situ formed surface spinel oxide as highly

stable electrocatalyst in Zn-air batteries, ACS Mater. Lett., 2020, **2**, 1698-1706.

- [14] M. W. Glasscott, A. D. Pendergast, S. Goines, A. R. Bishop, A. T. Hoang, C. Renault and J. E. Dick, Electrosynthesis of high-entropy metallic glass nanoparticles for designer, multi-functional electrocatalysis, Nat. Commun., 2019, **10**, 2650.
- [15] D. W. Lai, Q. L. Kang, F. Gao and Q. Y. Lu, High-entropy effect of a metal phosphide on enhanced overall water splitting performance, J. Mater. Chem. A, 2021, **9**, 17913-17922.
- [16] Z. W. Liu, X. X. Guo, T. L. Cui, S. H. Mu, Z. H. Ni, C. Z. Zhang and S. J. Lu. Porous freestanding FeCoMnNiSe<sub>2</sub> medium-entropy bifunctional electrocatalyst for oxygen and hydrogen evolution reactions in alkaline medium, J. Power Sources, 2024, **592**, 233956.
